# Supplementary material
Source: PubMed Central journal article supplement (PMC3261449)
Supplement: 10616_2011_9388_MOESM1_ESM.pdf [file 10616_2011_9388_MOESM1_ESM.pdf]

## Per 1 L of medium

|                                                                                    | <b>Amounts</b>          | <b>Brand</b> | <b>Catalog No.</b>                          |
|------------------------------------------------------------------------------------|-------------------------|--------------|---------------------------------------------|
| <b>Base</b>                                                                        |                         |              |                                             |
| Alpha MEM                                                                          | 500 ml                  | Hyclone      | SH30265.01                                  |
| DME/ F12                                                                           | 500 ml                  | Hyclone      | SH30023.01                                  |
| <b>Supplements</b>                                                                 |                         |              |                                             |
| glucose                                                                            | 2 g                     | Sigma        | G8270                                       |
| Pluronic F-68                                                                      | 4 g                     | Sigma        | P1300                                       |
| NaHCO <sub>3</sub>                                                                 | 1.3 g                   | Sigma        | S5761                                       |
| Chelated Ferric Citrate                                                            | 0.3 mM                  | Sigma        | F2877                                       |
| Ethanolamine                                                                       | 0.04 mM                 | Sigma        | E0135                                       |
| Bacto Tryptone                                                                     | 2.5 g                   | BD           | 211705                                      |
| Glutamine                                                                          | 292 mg                  | CELL GRO     | 61-030 RM                                   |
| Putrescine                                                                         | 0.1 mg                  | Sigma        | P5780                                       |
| MnSO <sub>4</sub> .H <sub>2</sub> O                                                | 0.2 ug                  | Sigma        | M1144                                       |
| Na <sub>2</sub> SeO <sub>3</sub>                                                   | 2 ug                    | Sigma        | S5261-10G                                   |
| (NH <sub>4</sub> ) <sub>6</sub> Mo <sub>7</sub> O <sub>24</sub> .4H <sub>2</sub> O | 0.01 mg                 | Sigma        | M1019                                       |
| Vitamin B6 (Pyridoxine hydrochloride)                                              | 0.1 mg                  | Sigma        | P8666                                       |
| NH <sub>4</sub> VO <sub>3</sub>                                                    | 1 ug                    | Sigma        | 573884                                      |
| Insulin                                                                            | 5 mg                    | SAFC         | 91077C or LONG®R3IGF-I as described in text |
| Linoleic Acid                                                                      | 0.1 mg                  | Sigma        | L1012                                       |
| MTX                                                                                | varies as per cell line | Sigma        | M8407                                       |
| <b>Amino acids</b>                                                                 |                         |              |                                             |
| L-Proline                                                                          | 20uM                    | Sigma        | P0380                                       |
| L-Tyrosine                                                                         | 20uM                    | Sigma        | T2269                                       |
| L-Serine                                                                           | 20uM                    | Sigma        | S4500                                       |
| L-Histidine                                                                        | 20uM                    | Sigma        | H8000                                       |
